# Supplementary material for: The Effect of Robot-Led Distraction during Needle Procedures on Pain-Related Memory Bias in Children with Chronic Diseases: A Pilot and Feasibility Study
Source: MDPI journal article supplement (doi:10.3390/children9111762), 2022-11-17
Supplement: s1 [file s1]

## SUPPLEMENTARY MATERIAL

**TableS1.** Summary of nurse perceptions of interventions.

| Item                                                                                                                                                          | Nurse response (n=4)                                                                                                                                                                                                                                                                                                                                                                                                                                                                                                                                                                                                                                                                                                                                                               |
|---------------------------------------------------------------------------------------------------------------------------------------------------------------|------------------------------------------------------------------------------------------------------------------------------------------------------------------------------------------------------------------------------------------------------------------------------------------------------------------------------------------------------------------------------------------------------------------------------------------------------------------------------------------------------------------------------------------------------------------------------------------------------------------------------------------------------------------------------------------------------------------------------------------------------------------------------------|
| What was, according to you, the purpose of the robot intervention?                                                                                            | Distraction of the child (1-4)<br>Reducing pain and anxiety during a needle procedure (2)                                                                                                                                                                                                                                                                                                                                                                                                                                                                                                                                                                                                                                                                                          |
| When you think of the needle procedure(s) you performed with the robot intervention, what went well?                                                          | Procedure went smooth (1,3)<br>I could focus on the procedure technique (1)<br>Depending on the individual child, the robot managed to distract the infant, causing them to experience less pain (2)<br>Children were distracted (4)                                                                                                                                                                                                                                                                                                                                                                                                                                                                                                                                               |
| When you think of the needle procedure(s) you performed with the robot intervention, what did not go well or what was challenging?                            | Not talking to the child or counting 3 2 1 during the procedure was an adjustment (1,2)<br>When the child did not immediately succeed in paying attention to the robot, I wanted to help him to return attention to the robot, but it was difficult to know whether we were allowed to do that or not (2)<br>Your instinct is to start comforting the child but that was not possible (2)<br>The robot did not always fluently register the children's answers to the quiz questions so that the child's attention went away from the robot (1)<br>The robot was not always easy to understand which made it difficult for the children to interact with it smoothly (2)<br>The introduction of the robot was a bit too long (4)                                                   |
| How did the children overall perceived the robot intervention according to you?                                                                               | Good, positive (1)<br>Some children are more easily impressed by a robot than others. The robot distracted some children well, others were less susceptible to it (2)<br>Enthusiastic (3)<br>Cool and fun, for children who were open to it (4)                                                                                                                                                                                                                                                                                                                                                                                                                                                                                                                                    |
| Do you have any other feedback on the robot intervention?                                                                                                     | Good method, but not applicable for each child (1)<br>Need for one additional person besides the nurse to control the robot (1,2)<br>I personally find the whole procedure unnecessary and do not see the added value (2)<br>Nurses can anticipate anxiety much better than a machine (2)<br>Robot had no high 'cuddle factor', perhaps a soft/stuffed version would be more successful? (2)<br>I believe that the use of a local anesthetic contributes more to a good distraction and pain reduction than the robot (2)<br>I felt that the entire procedure took more time than other forms of distraction already used (2)<br>The robot is a fun attraction which provides a good distraction (3)<br>Because of the tight protocol, things were perhaps a bit awkward/stiff (3) |
| Would you be inclined to use the robot during future needle procedures? (NRS-11); M(SD)                                                                       | 6.00 (2.55)                                                                                                                                                                                                                                                                                                                                                                                                                                                                                                                                                                                                                                                                                                                                                                        |
| According to you, how effective is the robot intervention in terms of pain reduction for children undergoing a needle procedure? (NRS-11); M(SD)              | 6.75 (1.64)                                                                                                                                                                                                                                                                                                                                                                                                                                                                                                                                                                                                                                                                                                                                                                        |
| According to you, how effective is the robot intervention in terms of pain-related fear reduction for children undergoing a needle procedure? (NRS-11); M(SD) | 5.50 (2.06)                                                                                                                                                                                                                                                                                                                                                                                                                                                                                                                                                                                                                                                                                                                                                                        |

1 = nurse 1; 2 = nurse 2; 3 = nurse 3; 4 = nurse 4. Results presented in this table summarize the statements reported by the nurses after data collection was completed. Of note; most and also the most negative feedback was reported by nurse 2.
